# Supplementary material for: Detecting critical slowing down in high-dimensional epidemiological systems
Source: PubMed Central journal article supplement (PMC7082051; doi:10.1371/journal.pcbi.1007679), 2020-03-09
Supplement: pcbi.1007679.s003.pdf [file pcbi.1007679.s003.pdf]

**S1 Table: User-modifiable disease-specific parameters**

| Parameter Type             | Parameter                   | Definition                                                                                                                        | Value                                                                                                         |
|----------------------------|-----------------------------|-----------------------------------------------------------------------------------------------------------------------------------|---------------------------------------------------------------------------------------------------------------|
| Natural history parameters | Days latent                 | Discrete cdf for number of days between becoming exposed and becoming infectious                                                  | Lognormal, Median 8.0, Dispersion 1.5                                                                         |
|                            | Symptomatic rate            | The probability of an infected person becoming symptomatic                                                                        | 1.0                                                                                                           |
|                            | Days asymptomatic           | Discrete cdf for number of days the agent is infectious and asymptomatic                                                          | Not used                                                                                                      |
|                            | Days symptomatic            | Discrete cdf for number of days the agent is infectious and symptomatic                                                           | Lognormal, Median 5.0, Dispersion 1.5                                                                         |
|                            | Immunity Loss Rate          | Rate at which a person loses immunity after recovering from infection                                                             | No loss of immunity                                                                                           |
|                            | Mortality Rate              | The probability of an infected person dying                                                                                       | No death due to infection                                                                                     |
| Contact parameters         | Probability of staying home | The baseline probability that an agent stays home if the agent experiences a symptomatic infection                                | No stay-at-home behavior                                                                                      |
|                            | Household contact rates     | The expected number of potentially infective daily contacts between an infectious agent and a susceptible agent in a household    | Household.contacts = 0.3421<br>Household.same_age_bias = 0.05                                                 |
|                            | Neighborhood contact rate   | The expected number of potentially infective daily contacts between an infectious agent and a susceptible agent in a neighborhood | Neighborhood.contacts = 0.7495<br>Neighborhood.same_age_bias = 0.1<br>Neighborhood.weekend_contact_rate = 1.5 |
|                            | School contact rates        | The expected number of potentially infective daily contacts between an infectious agent and a susceptible agent in a school       | School.contacts = 0.4159<br>Classroom.contacts = 0.8318                                                       |
|                            | Workplace contact rates     | The expected number of potentially infective daily contacts between an infectious agent and a susceptible agent in a workplace    | Workplace.contacts = 0.0679<br>Office.contacts = 0.1358                                                       |
| Transmission parameters    | Transmissibility            | The transmissibility of disease relative to an arbitrary baseline set by calibration                                              | 2.0                                                                                                           |
|                            | Asymptomatic infectivity    | Multiplier for how infective an asymptomatic infected agent is, relative to an symptomatic agent                                  | Not used                                                                                                      |

FRED includes natural history and transmission parameters for pandemic influenza as used in previous models. Contact parameters were calibrated for the FRED synthetic population using the methods described in [1]. All contact rates are positive real numbers. For more details about these and other user-settable parameters, please see the FRED User Guide.

## References

1. Cooley P, Brown S, Cajka J, Chasteen B, Ganapathi L, Grefenstette J, et al. The role of subway travel in an influenza epidemic: a New York City simulation. *Journal of Urban Health*. 2011;88(5):982.
